# Supplementary material for: Comparative Analysis of the Minimum Number of Replication Origins in Trypanosomatids and Yeasts
Source: Genes (Basel). 2020 May 8;11(5):523. doi: 10.3390/genes11050523 (PMC7288466; doi:10.3390/genes11050523)
Supplement: Supplementary file 1 [file genes-11-00523-s001.pdf]

Supplementary material of

**Comparative analysis of the minimum number of replication origins in  
trypanosomatids and yeasts**

Marcelo S. da Silva<sup>a\*</sup>, Marcela O. Vitarelli<sup>a</sup>, Bruno F. Souza<sup>a</sup>, and Maria Carolina Elias<sup>a\*</sup>

**Address:** <sup>a</sup>Laboratório de Ciclo Celular, Center of Toxins, Immune Response and Cell Signaling (CeTICS), Instituto Butantan, 05503-900, São Paulo, Brazil; [mamasantos2003@yahoo.com.br](mailto:mamasantos2003@yahoo.com.br) (M.S.S.); [marcela.vitarelli@butantan.gov.br](mailto:marcela.vitarelli@butantan.gov.br) (M.O.V.); [fsouza.bruno@gmail.com](mailto:fsouza.bruno@gmail.com) (B.F.S.); [carolina.eliassabbaga@butantan.gov.br](mailto:carolina.eliassabbaga@butantan.gov.br) (M.C.E.)

**\*Correspondence:** e-mail: [carolina.eliassabbaga@butantan.gov.br](mailto:carolina.eliassabbaga@butantan.gov.br) or [mamasantos2003@yahoo.com.br](mailto:mamasantos2003@yahoo.com.br).

## Figure S1

### *Trypanosoma cruzi*

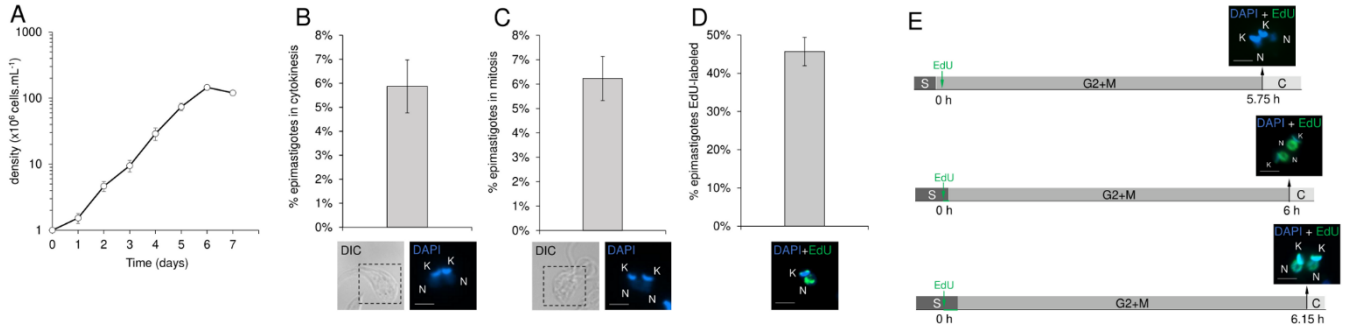

### *Leishmania major*

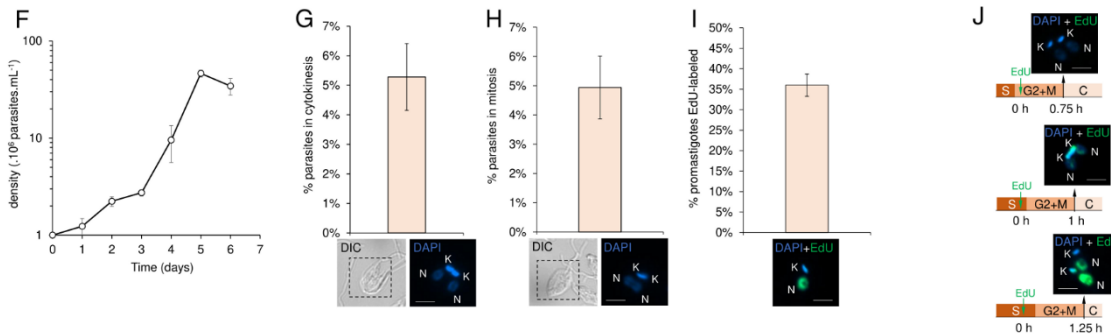

**Figure S1. Parameters required to use the CeCyD website.** **A, F.** The doubling time for **(A)** epimastigote forms of *T. cruzi* was estimated to be 24 h, and for **(F)** promastigote forms of *L. major* was estimated to be 10.5 h. These estimates were confirmed taking the values at exponential phase and using Doubling Time software (<http://www.doubling-time.com>). Error bars indicate SD of three independent experiments. **B, G.** DAPI-labeled parasites (2K2N) were used to measure the percentage of parasites in cytokinesis ( $n = 208$  for *T. cruzi* and  $232$  for *L. major*). **C, H.** DAPI-labeled parasites (2K2N with the nucleus dividing) were used to measure the percentage of parasites in mitosis ( $n = 62$  for *T. cruzi* and  $58$  for *L. major*). **D, I.** EdU-labeled parasites (after 1 h EdU pulse) were used to estimate the percentage of parasites able to uptake this thymidine analog ( $45.7 \pm 1.7\%$  for *T. cruzi* and  $36 \pm 1.7\%$  for *L. major*). **E, J.** To estimate the duration of the G2 + M phases, EdU was added to the culture, and parasites were continuously collected every 15 min until parasites containing two EdU-labeled nuclei in the same cell (cytokinesis) were observed. This pattern was observed after **(E)** 6 h for *T. cruzi*, and after **(J)** 1 h for *L. major*. This assay was carried out in triplicate, and in all replicates, we found a parasite containing two EdU-labeled nuclei at the same time. Error bars represent SD. The scale bars for the fluorescence images correspond to 2  $\mu$ m.
